# Supplementary material
Source: Springer Nature journal article supplement (https://www.springermedizin.de/resource/supplementary/12985_2009_801_MOESM1_ESM.pdf/9609222)
Supplement: MOESM1 [file 9609222]

MYXV:

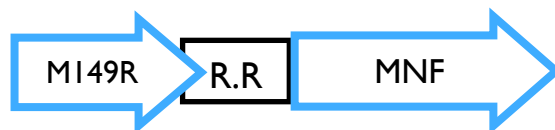

MYXV-GFPMNF:

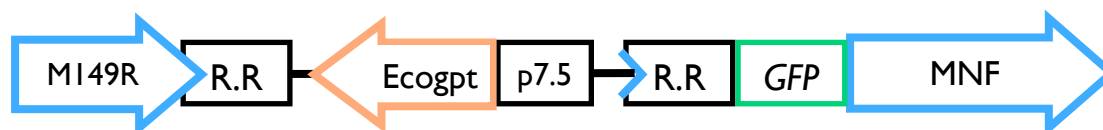

clinical signs following virus infection

Days p.i.

Wild-type MYXV and MYXV-GFPMNF

MYXV- $\Delta$ MNF[3]

0

Intradermal inoculation of 5 rabbits with 5,000 FFU of virus

Intradermal inoculation of 12 rabbits with 5,000 FFU of MYXV- $\Delta$ MNF

4-6

Primary lesions at inoculation sites: raised, soft, red (ca. 1 cm)

Primary lesions at inoculation sites: raised, soft, congested (ca. 1,5 cm); one rabbit showed mild blepharitis

8

Large and diffused primary myxomas, secondary infections of conjunctivas and respiratory tract, dyspnea, and multiple secondary lesions on face, ears, back and testis

Congested, exudating (ca. 2 cm) primary myxomas, three rabbits with a few (1 to 3) minute myxomas on the nose; blepharitis in the one rabbit healed, leaving only a minute myxoma

12

Multiple secondary lesions, turning necrotic, severe infections of respiratory tracts, prostrated and emaciated animals. All rabbits sacrificed due to increased severity of the clinical signs

Flat primary myxomas, topped by a crust, minute myxomas on ears, noses, and eyelids of all rabbits; no dyspnea or inflammation of the respiratory tract was seen. Discrete inflammation of the testicles

21

Scabbed primary myxomas, involuted secondary myxomas; all rabbits recovered
